# Supplementary material
Source: PubMed Central journal article supplement (PMC5849568)
Supplement: NIHMS939379-supplement-Supplementary_material.pdf [file NIHMS939379-supplement-Supplementary_material.pdf]

## SUPPLEMENTARY NOTE

### CONSORTIUM MEMBERS

**Spanish GCA Study Group members:** Juan J. Alegre-Sancho<sup>9</sup>, Ricardo Blanco<sup>10</sup>, José Luis Callejas<sup>11</sup>, Luis Caminal-Montero<sup>12</sup>, Santos Castañeda<sup>13</sup>, M. C. Cid<sup>14</sup>, Marc Corbera-Bellalta<sup>15</sup>, Eugenio de Miguel<sup>16</sup>, J. Bernardino Díaz-López<sup>12</sup>, Begoña Escalante<sup>13</sup>, Patricia Fanlo Mateo<sup>18</sup>, Benjamín Fernández-Gutiérrez<sup>19</sup>, Antonio Fernández-Nebro<sup>20</sup>, María Jesús García-Villanueva<sup>21</sup>, Carmen Gómez-Vaquero<sup>22</sup>, Elena Grau<sup>23</sup>, Mercedes Guijarro Rojas<sup>24</sup>, José Hernández-Rodríguez<sup>14</sup>, Ana Hidalgo-Conde<sup>25</sup>, Francisco J. López-Longo<sup>26</sup>, Ana Belén Madroñero Vuelta<sup>27</sup>, Begoña Marí-Alfonso<sup>28</sup>, Lina Martínez<sup>26</sup>, Agustín Martínez-Berriochoa<sup>29</sup>, Víctor Manuel Martínez-Taboada<sup>10</sup>, Aleida Martínez-Zapico<sup>12</sup>, José A. Miranda-Fillooy<sup>30</sup>, Jordi Monfort<sup>31</sup>, Inmaculada C. Morado<sup>19</sup>, Javier Narváez<sup>32</sup>, M. Carmen Ordóñez-Cañizares<sup>20</sup>, Norberto Ortego-Centeno<sup>11</sup>, Mercedes Pérez-Conesa<sup>33</sup>, Sergio Prieto-González<sup>14</sup>, Marc Ramentol-Sintas<sup>34</sup>, Enrique Raya<sup>19</sup>, Raquel Ríos Fernández<sup>11</sup>, Luis Rodríguez-Rodríguez<sup>19</sup>, José A. Román<sup>23</sup>, Luis Sáez-Comet<sup>33</sup>, Julio Sánchez-Martín<sup>36</sup>, Olga Sánchez-Pernaute<sup>37</sup>, Roser Solans<sup>34</sup>, Bernardo Sopeña<sup>38</sup>, Laura Tío<sup>31</sup>, Ainhoa Unzurrunzaga<sup>39</sup>, Esther F. Vicente<sup>13</sup>.

**UK GCA Consortium members:** Bhaskar Dasgupta<sup>40</sup>, Stephen Eyre<sup>41</sup>, Michael Green<sup>42</sup>, Andrew Gough<sup>43</sup>, Lesley Hordon<sup>44</sup>, Stephen Jarret<sup>45</sup>, Sanjeet Kamath<sup>46</sup>, Sarah Levy<sup>47</sup>, Sarah L. Mackie<sup>48</sup>, Yusuf Patel<sup>49</sup>, Colin T. Pease<sup>50</sup>, John C. Taylor<sup>51</sup>, Richard Watts<sup>52</sup>, Jane Worthington<sup>41</sup>.

**Turkish Takayasu Study Group members:** Fatima Alibaz-Oner<sup>53</sup>, Servet Akar<sup>54</sup>, Nurullah Akkoc<sup>54</sup>, Kenan Aksu<sup>55</sup>, Askin Ates<sup>56</sup>, Sibel Z. Aydin<sup>53</sup>, Muge Bıçakçigil<sup>57</sup>, Ayse Cefle<sup>58</sup>, Veli Cobankara<sup>59</sup>, Patrick Coit<sup>7</sup>, Ediz Dalkilic<sup>60</sup>, Haner Direskeneli<sup>53</sup>, Nurşen Duzgun<sup>61</sup>, Eren Erken<sup>62</sup>, Izzet Fresko<sup>63</sup>, Murat Inanc<sup>64</sup>, Sevil Kamali<sup>64</sup>, Yasar Karaaslan<sup>56</sup>, Omer Karadag<sup>65</sup>, Timuçin Kaşifoğlu<sup>73</sup>, Gokhan Keser<sup>66</sup>, Bünyamin Kısacık<sup>67</sup>, Sedat Kiraz<sup>65</sup>, Ahmet Mesut Onat<sup>68</sup>, Fatos Onen<sup>54</sup>, Zeynep Ozbalkan<sup>56</sup>, Hüseyin TE Ozer<sup>69</sup>, Mehmet A. Ozturk<sup>70</sup>, Ömer N. Pamuk<sup>71</sup>, Güher Saruhan-Direskeneli<sup>72</sup>, Emire Seyahi<sup>63</sup>, Ercan Tunc<sup>73</sup>, Ayten Yazici<sup>74</sup>, Sibel P. Yentür<sup>72</sup>.

**Vasculitis Clinical Research Consortium members:** Simon Carette<sup>75</sup>, Sharon A. Chung<sup>76</sup>, David Cuthbertson<sup>77</sup>, Lindsay J. Forbess<sup>78</sup>, Gary S. Hoffman<sup>79</sup>, Nader A. Khalidi<sup>80</sup>, Curry L. Koenig<sup>81</sup>, Carol A. Langford<sup>79</sup>, Carol A. McAlear<sup>82</sup>, Kathleen McKinnon-Maksimowicz<sup>83</sup>, Peter A Merkel<sup>82</sup>, Paul A. Monach<sup>84</sup>, Larry Moreland<sup>85</sup>, Christian Pagnoux<sup>75</sup>, Philip Seo<sup>86</sup>, Robert Spiera<sup>87</sup>, Antoine G. Sreih<sup>82</sup>, Kenneth J. Warrington<sup>88</sup>, Steven R. Ytterberg<sup>88</sup>.

**IgAV Study Group members:** Maximiliano Aragües<sup>89</sup>, Ricardo Blanco<sup>10</sup>, Juan María Blanco-Madrigo<sup>91</sup>, Santos Castañeda<sup>13</sup>, Diego de Argila<sup>89</sup>, Eva Galíndez-Aguirregoikoa<sup>90</sup>, Fernanda Genre<sup>3</sup>, Manuel León Luque<sup>91</sup>, Javier Llorca<sup>92</sup>, Verónica Mijares<sup>3</sup>, José A. Miranda-Fillooy<sup>30</sup>, Antonio Navas Parejo<sup>93</sup>, Norberto Ortego-Centeno<sup>11</sup>, Trinitario Pina<sup>3</sup>, Sara Remuzgo-Martínez<sup>3</sup>, Esteban Rubio<sup>91</sup>, Belén Sevilla-Perez<sup>94</sup>, Begoña Ubilla<sup>3</sup>.

**AAV Study Group members:** Paul Brenchley<sup>95</sup>, Afzal N Chaundhry<sup>96</sup>, David G Clayton<sup>97</sup>, Panos Deloukas<sup>98</sup>, Lorraine Harper<sup>99</sup>, David RW Jayne<sup>96</sup>, Mark A Little<sup>100</sup>, Sandosh Padmanabhan<sup>101</sup>, Charles D Pusey<sup>102</sup>, Tim F Rayner<sup>96</sup>, Alan D Salamana<sup>100</sup>, Caroline O Savage<sup>103</sup>, Sapna Trivedi<sup>96</sup>, Richard A Watts<sup>104</sup>.

### AFFILIATIONS:

9. Department of Reumatology, Hospital Universitario Doctor Peset, Valencia, Spain.

10. Department of Rheumatology, Hospital Universitario Marqués de Valdecilla, IDIVAL, University of Cantabria, Santander, Spain.

11. Department of Internal Medicine, Hospital Clínico San Cecilio, Granada, Spain.

12. Department of Internal Medicine, Hospital Central de Asturias, Oviedo, Spain.
13. Rheumatology Department, Hospital Universitario La Princesa, IIS-IPrincesa, Madrid, Spain.
14. Vasculitis Research Unit, Department of Autoimmune Diseases, Hospital Clinic, University of Barcelona, Institut d'Investigacions Biomèdiques August Pi I Sunyer (IDIBAPS), Barcelona, Spain.
15. Vasculitis Research Unit, Department of Autoimmune and Systemic Diseases, Hospital Clinic, University of Barcelona, Centre de Recerca Biomèdica Cellex (IDIBAPS), Barcelona, Spain.
16. Department of Rheumatology, Hospital Universitario de La Paz, Madrid, Spain.
17. Department of Internal Medicine, Hospital Clínico Universitario Lozano Blesa, Zaragoza, Spain.
18. Department of Internal Medicine, Hospital Virgen del Camino, Pamplona, Spain. Rheumatology Department, Hospital Universitario Marqués de Valdecilla, Facultad de Medicina, Universidad de Cantabria, Santander, Spain.
19. Department of Rheumatology, Hospital Clínico San Carlos, Madrid, Spain.
20. Rheumatology Department, Hospital Carlos Haya, Málaga, Spain.
21. Department of Rheumatology, Hospital Ramón y Cajal, Madrid, Spain.
22. Department of Rheumatology, Hospital Universitario de Bellvitge-IDIBELL, L'Hospitalet de Llobregat, Barcelona, Spain.
23. Department of Rheumatology, Hospital Universitario y Politécnico La Fe, Valencia, Spain.
24. Department de Pathology, Hospital de La Princesa, IISIP, Madrid, Spain.
25. Department of Internal Medicine, Hospital Universitario Virgen de la Victoria, Málaga, Spain.
26. Department of Rheumatology, Hospital General Universitario Gregorio Marañón, Madrid, Spain.
27. Departament of Internal Medicine, Hospital Universitario Arnau de Vilanova, Lleida, Spain.
28. Department of Internal Medicine, Corporació Sanitaria Parc Taulí, Instituto Universitario Parc Taulí, UAB, Sabadell, Barcelona, Spain.
29. Department of Internal Medicine, Hospital de Cruces, Barakaldo, Spain.
30. Department of Rheumatology, Hospital Xeral-Calde, Lugo, Spain.
31. Department of Rheumatology, Grup de recerca cel·lular en inflamació i cartílag. IMIM (Institut de Recerca Hospital del Mar), Barcelona, Spain.
32. Department of Rheumatology, Hospital Universitario de Bellvitge-IDIBELL, L'Hospitalet de Llobregat, Barcelona, Spain.
33. Department of Internal Medicine, Hospital Universitario Miguel Servet, Zaragoza, Spain.
34. Autoimmune Systemic Diseases Unit, Department of Internal Medicine, Hospital Vall d'Hebron, Autonomous University of Barcelona, Barcelona, Spain.
35. Department of Rheumatology, Hospital de La Princesa, IISIP, Madrid, Spain.
36. Department of Rheumatology, Hospital Universitario 12 de Octubre, Madrid, Spain.
37. Rheumatology Division, Fundación Jiménez Díaz, Universidad Autónoma, Madrid, Spain.
38. Department of Internal Medicine, Complejo Hospitalario Universitario de Vigo Xeral-Chuvi, Spain.
39. Department of Internal Medicine, Hospital de Galdakao, Vizcaya, Spain.
40. Department of Rheumatology, Southend University Hospital NHS Foundation Trust, Westcliff-on-Sea SS0 0RY, UK.
41. NIHR Manchester Musculoskeletal Biomedical Research Unit, Manchester Academy of Health Sciences, Manchester, UK; Arthritis Research UK Epidemiology Unit, University Of Manchester, Manchester M13 9NT, UK.
42. Department of Rheumatology, York Teaching Hospital NHS Foundation Trust, York YO31 8HE, UK.
43. Department of Rheumatology, Harrogate and District NHS Foundation Trust, Harrogate HG2 7SX, UK.
44. Department of Rheumatology, Mid Yorkshire Hospitals NHS Trust, Dewsbury and District Hospital, Dewsbury WF13 4HS, UK.
45. Department of Rheumatology, Mid Yorkshire Hospitals NHS Trust, Pinderfields Hospital, Wakefield WF1 4DG, UK.
46. Department of Rheumatology, Staffordshire and Stoke-on-Trent Partnership NHS Trust, Staffordshire ST6 7AG, UK.
47. Department of Rheumatology, Croydon Health Service NHS Trust, Croydon CR7 7YE, UK.
48. Leeds Institute of Rheumatic and Musculoskeletal Medicine and NIHR-Leeds Musculoskeletal Biomedical Research Unit, University of Leeds, Leeds LS7 4SA, UK.
49. Department of Rheumatology, Hull and East Yorkshire NHS Trust, Hull HU3 2JZ, UK.
50. Department of Rheumatology, Leeds Teaching Hospitals NHS Trust, Leeds LS7 4SA, UK.
51. School of Medicine and NIHR-Leeds Musculoskeletal Biomedical Research Unit, University of Leeds, Leeds LS9 7TF, UK.
52. Department of Rheumatology, Ipswich Hospital NHS Trust, Ipswich IP4 5PD, UK.
53. Marmara University, School of Medicine, Department of Rheumatology, Istanbul, Turkey.
54. Department of Rheumatology, Dokuz Eylül University, Faculty of Medicine, Izmir, Turkey.
55. Department of Rheumatology, Ege University, Faculty of Medicine, Izmir, Turkey.
56. Department of Rheumatology, Ankara Numune Training and Research Hospital, Ankara, Turkey.
57. Department of Rheumatology, Yeditepe University, Faculty of Medicine, Istanbul, Turkey.
58. Department of Rheumatology, Kocaeli University, Faculty of Medicine, Kocaeli, Turkey.
59. Department of Rheumatology, Pamukkale University Faculty of Medicine, Denizli, Turkey.
60. Department of Rheumatology, Uludag University, Faculty of Medicine, Bursa, Turkey.
61. Department of Rheumatology, Ankara University, Faculty of Medicine, Ankara, Turkey.
62. Department of Rheumatology, Cukurova University, Faculty of Medicine, Adana, Turkey.
63. Department of Rheumatology, Istanbul University, Cerrahpasa Faculty of Medicine, Istanbul, Turkey.
64. Department of Rheumatology, Istanbul University, Istanbul Faculty of Medicine, Istanbul, Turkey.
65. Department of Rheumatology, Hacettepe University, Faculty of Medicine, Ankara, Turkey.
66. Department of Rheumatology, Osman Gazi University, Faculty of Medicine, Eskişehir, Turkey.

67. Department of Rheumatology, Gaziantep University, Faculty of Medicine, Gaziantep, Turkey.
68. Department of Rheumatology, Gaziantep University, Faculty of Medicine, Gaziantep, Turkey.
69. Department of Rheumatology, Cukurova University, Faculty of Medicine, Adana, Turkey.
70. Department of Rheumatology, Gazi University, Faculty of Medicine, Ankara, Turkey.
71. Department of Rheumatology, Trakya University, Faculty of Medicine, Edirne, Turkey.
72. Department of Physiology, Istanbul University, Istanbul Faculty of Medicine, Istanbul, Turkey.
73. Department of Rheumatology, Suleyman Demirel University, Faculty of Medicine, Isparta, Turkey.
74. Department of Rheumatology, Kocaeli University, Faculty of Medicine, Kocaeli, Turkey.
75. Division of Rheumatology, Mount Sinai Hospital, Toronto, ON, USA.
76. Rosalind Russell-Ephraim P. Engleman Rheumatology Research Center, Division of Rheumatology, University of California San Francisco, San Francisco, CA, USA.
77. Department of Biostatistics, University of South Florida, Tampa, FL, USA.
78. Division of Rheumatology, Cedars-Sinai Medical Center, Los Angeles, CA, USA.
79. Center for Vasculitis Care and Research, Department of Rheumatology, Cleveland Clinic Foundation, Cleveland, OH, USA.
80. Division of Rheumatology, St. Joseph's Healthcare, McMaster University, Hamilton, ON, Canada.
81. Division of Rheumatology, University of Utah, Salt Lake City, UT, USA.
82. Penn Vasculitis Center, Division of Rheumatology, University of Pennsylvania, Philadelphia, PA, USA.
83. Division of Rheumatology, University of Pittsburgh, Pittsburgh, PA, USA.
84. The Vasculitis Center Section of Rheumatology, Boston University School of Medicine, Boston, MA, USA.
85. Division of Rheumatology and Clinical Immunology, University of Pittsburgh, Pittsburgh, PA, USA.
86. Division of Rheumatology, Johns Hopkins University, Baltimore, MD, USA.
87. Department of Rheumatology, Hospital for Special Surgery, New York, USA.
88. Division of Rheumatology, Mayo Clinic College of Medicine, Rochester, MN, USA.
89. Dermatology Department, Hospital Universitario La Princesa, IIS-IPrincesa, Madrid, Spain.
90. Rheumatology Department, Hospital Universitario de Basurto, Bilbao, Spain.
91. Hospital Universitario Virgen del Rocío, Sevilla, Spain.
92. Epidemiology and Computational Biology Department, School of Medicine, University of Cantabria, and CIBER Epidemiología y Salud Pública (CIBERESP), IDIVAL, Santander, Spain. Rheumatology Department,
93. Nephrology Department, Hospital Universitario San Cecilio, Granada, Spain.
94. Medicine Department, Hospital Universitario San Cecilio, Granada, Spain.
95. Cardiovascular Research, School of Biomedicine, University of Manchester, Manchester, UK.
96. Department of Medicine, University of Cambridge School of Clinical Medicine, Addenbrooke's Hospital, Cambridge, UK.
97. Cambridge Institute for Medical Research, and Department of Medical Genetics, University of Cambridge School of Clinical Medicine, Addenbrooke's Hospital, Cambridge, UK.
98. Wellcome Trust Sanger Institute, Hinxton, Cambridge, UK.
99. School of Immunity and Infection, University of Birmingham, Edgbaston, Birmingham, UK.
100. University College London Center for Nephrology, Royal Free Hospital, London, UK.
101. Institute of Cardiovascular and Medical Sciences, University of Glasgow, Glasgow, UK.
102. Department of Medicine, Renal Section, Imperial College London, London, UK.
103. Cambridge Institute for Medical Research, and Department of Medicine, University of Cambridge School of Clinical Medicine, Addenbrooke's Hospital, Cambridge, UK.
104. Department of Rheumatology, Ipswich Hospital National Health Service Trust, Ipswich, Suffolk, UK.

## Study population

The study population comprised 2,465 cases from four vasculitides (GCA, TAK, AAV, and IgAV) and 4,632 unaffected controls, organised as follows: the GCA dataset comprised two independent populations, one from Spain (763 cases and 850 controls) and another from UK (251 cases and 1000 controls); the TAK dataset included two populations, one of European ancestry from North America (USA/Canada; 112 cases and 599 controls) and one from Turkey (339 cases and 516 controls); the AAV dataset included 685 cases and 1,000 controls from UK; and the IgAV dataset comprised a population from Spain (315 cases and 667 controls). GCA and TAK patients were diagnosed following their respective 1990 American College of Rheumatology classification criteria [1, 2]. Additionally, GCA patients were only enrolled if they had a positive temporal artery biopsy, as described [3]. The EMEA clinically-based algorithm was used to classify AAV patients [4]. The IgA vasculitis condition was diagnosed accordingly with both the guidelines included in Michel *et al.* [5] and the American College of Rheumatology classification criteria for this disease [6]. The most relevant clinical data of each case cohort were described elsewhere [7-10]. All participants signed a written informed consent before being enrolled in the study. The procedures were followed according to the ethical standards of the Ethics Committees on human experimentation of the responsible committee on human experimentation (institutional and national) of all participant centres.

**Figure S1.** Manhattan plot representation of the overall cross-disease meta-analysis of the imputed HLA region. The  $-\log_{10}$  of the inverse variance-weighted meta-analysis p-values are plotted against their physical chromosomal position. The diamond size depends on the linkage disequilibrium ( $r^2$ ) with the lead signal (rs6457617).

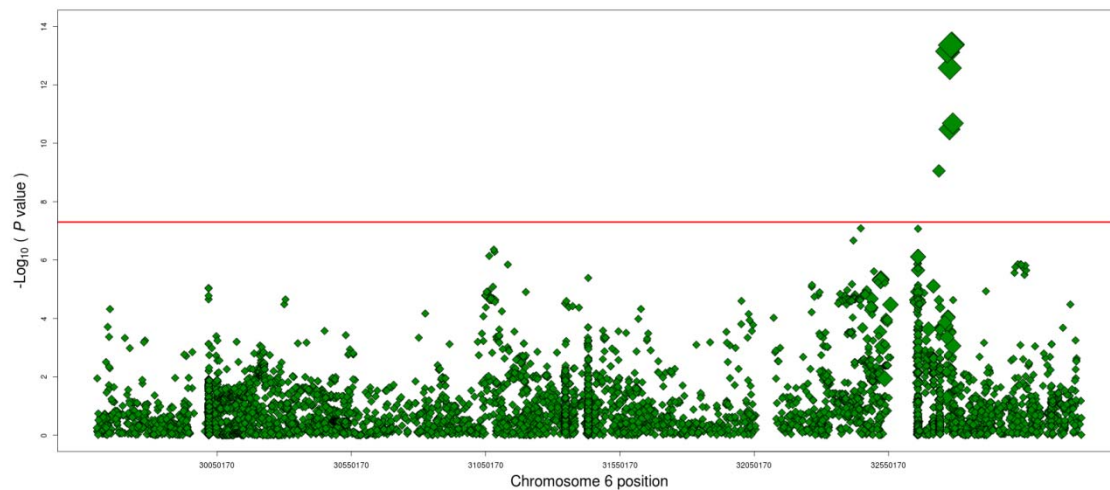

**Figure S2.** Regional association plot of the *KDM4C* region. The lead variant (rs16925200) is highlighted in violet.

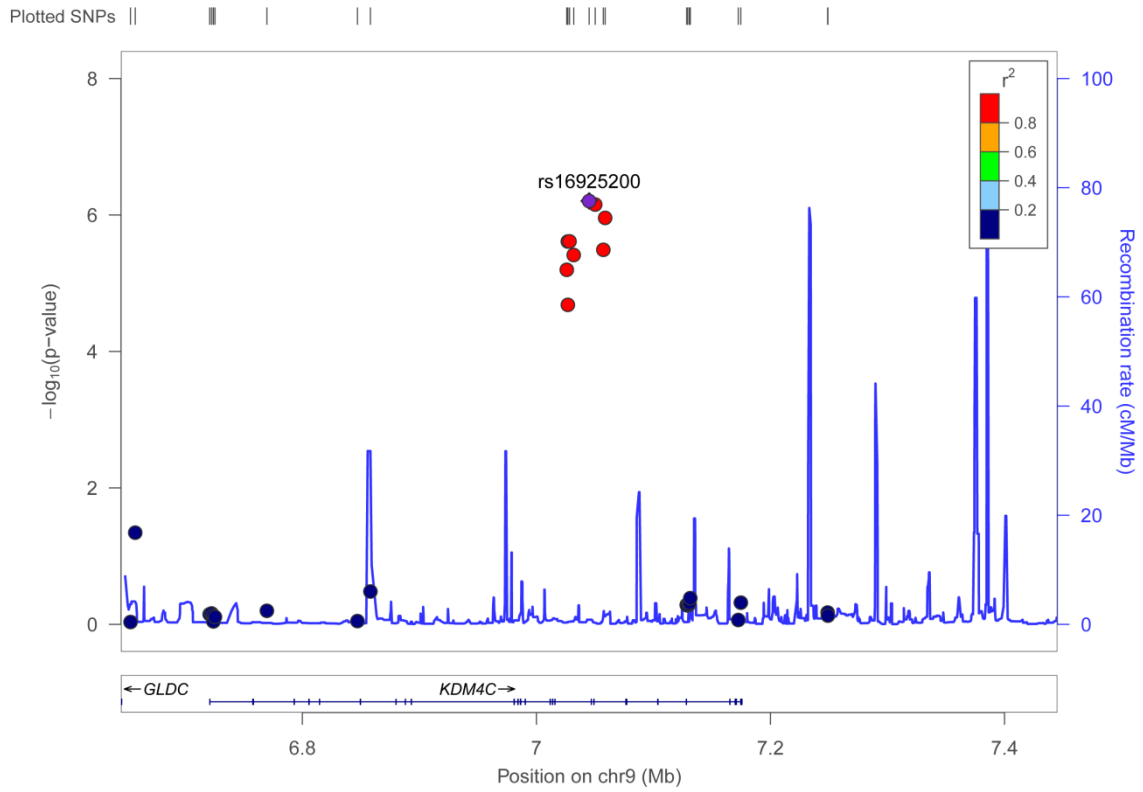

#### References for 'Study population' and Table S4.

1. Arend WP, Michel BA, Bloch DA, Hunder GG, Calabrese LH, Edworthy SM, et al. The American College of Rheumatology 1990 criteria for the classification of Takayasu arteritis. *Arthritis and rheumatism*. 1990; 33:1129-1134.
2. Hunder GG, Bloch DA, Michel BA, Stevens MB, Arend WP, Calabrese LH, et al. The American College of Rheumatology 1990 criteria for the classification of giant cell arteritis. *Arthritis and rheumatism*. 1990; 33:1122-1128.
3. Gonzalez-Gay MA, Martinez-Dubois C, Agudo M, Pompei O, Blanco R, Llorca J. Giant cell arteritis: epidemiology, diagnosis, and management. *Current rheumatology reports*. 2010; 12:436-442.
4. Watts R, Lane S, Hanslik T, Hauser T, Hellmich B, Koldingsnes W, et al. Development and validation of a consensus methodology for the classification of the ANCA-associated vasculitides and polyarteritis nodosa for epidemiological studies. *Annals of the rheumatic diseases*. 2007; 66:222-227.
5. Michel BA, Hunder GG, Bloch DA, Calabrese LH. Hypersensitivity vasculitis and Henoch-Schonlein purpura: a comparison between the 2 disorders. *The Journal of rheumatology*. 1992; 19:721-728.
6. Mills JA, Michel BA, Bloch DA, Calabrese LH, Hunder GG, Arend WP, et al. The American College of Rheumatology 1990 criteria for the classification of Henoch-Schonlein purpura. *Arthritis and rheumatism*. 1990; 33:1114-1121.
7. Carmona FD, Mackie SL, Martin JE, Taylor JC, Vaglio A, Eyre S, et al. A large-scale genetic analysis reveals a strong contribution of the HLA class II region to giant cell arteritis susceptibility. *American journal of human genetics*. 2015; 96:565-580.
8. Lopez-Mejias R, Carmona FD, Castaneda S, Genre F, Remuzgo-Martinez S, Sevilla-Perez B, et al. A genome-wide association study suggests the HLA Class II region as the major susceptibility locus for IgA vasculitis. *Scientific reports*. 2017; 7:5088.
9. Lyons PA, Rayner TF, Trivedi S, Holle JU, Watts RA, Jayne DR, et al. Genetically distinct subsets within ANCA-associated vasculitis. *The New England journal of medicine*. 2012; 367:214-223.

10. Saruhan-Direskeneli G, Hughes T, Aksu K, Keser G, Coit P, Aydin SZ, et al. Identification of multiple genetic susceptibility loci in Takayasu arteritis. *American journal of human genetics*. 2013; 93:298-305.
11. Carmona FD, Vaglio A, Mackie SL, Hernandez-Rodriguez J, Monach PA, Castaneda S, et al. A Genome-wide Association Study Identifies Risk Alleles in Plasminogen and P4HA2 Associated with Giant Cell Arteritis. *American journal of human genetics*. 2017; 100:64-74.
12. Merkel PA, Xie G, Monach PA, Ji X, Ciavatta DJ, Byun J, et al. Identification of Functional and Expression Polymorphisms Associated With Risk for Antineutrophil Cytoplasmic Autoantibody-Associated Vasculitis. *Arthritis Rheumatol*. 2017; 69:1054-1066.
13. Xie G, Roshandel D, Sherva R, Monach PA, Lu EY, Kung T, et al. Association of granulomatosis with polyangiitis (Wegener's) with HLA-DPB1\*04 and SEMA6A gene variants: evidence from genome-wide analysis. *Arthritis and rheumatism*. 2013; 65:2457-2468.
14. Terao C, Yoshifuji H, Kimura A, Matsumura T, Ohmura K, Takahashi M, et al. Two susceptibility loci to Takayasu arteritis reveal a synergistic role of the IL12B and HLA-B regions in a Japanese population. *American journal of human genetics*. 2013; 93:289-297.
15. Renauer PA, Saruhan-Direskeneli G, Coit P, Adler A, Aksu K, Keser G, et al. Identification of Susceptibility Loci in IL6, RPS9/LILRB3, and an Intergenic Locus on Chromosome 21q22 in Takayasu Arteritis in a Genome-Wide Association Study. *Arthritis Rheumatol*. 2015; 67:1361-1368.
